# Supplementary material
Source: HighWire-hosted journal article supplement (https://jnm.snmjournals.org/highwire/filestream/94655/field_highwire_adjunct_files/0/140426_Supplemental_Data.pdf)
Supplement: 140426_Supplemental_Data.pdf [file 140426_Supplemental_Data.pdf]

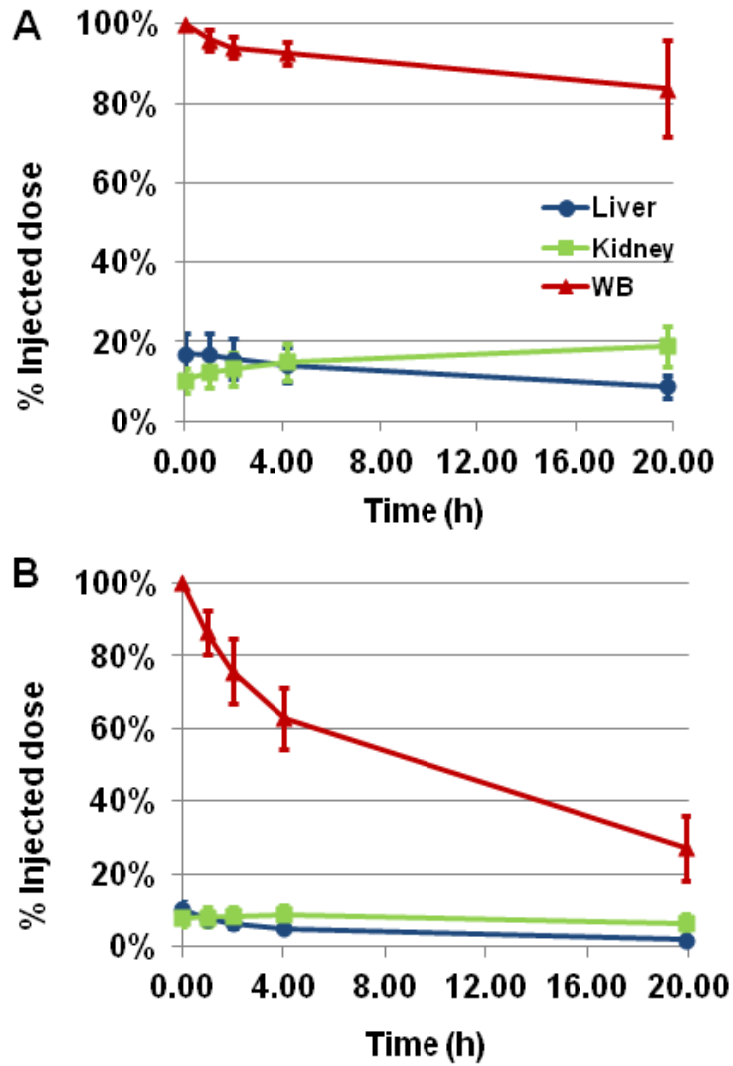

**Supplemental Figure 1:** Whole body clearance, liver and kidney uptake of  $^{99m}\text{Tc}$ -MIP-1404 (A) or  $^{99m}\text{Tc}$ -MIP-1405 (B) in normal subjects and in patients with metastatic prostate cancer. The data shows the mean and SD of all 12 subjects in the study.
